# Supplementary material
Source: PubMed Central journal article supplement (PMC5153959)
Supplement: JVIM-30-1112-s001.pdf [file JVIM-30-1112-s001.pdf]

**Supplemental Table 1: Dose to organs at risk (OARs).** The minimum (Min), maximum (Max), and average volume (Mean) doses are listed.

|            |      | <b>Dose to OARs* (Gy)</b> |                   |                   |                  |                 |                        |                       |
|------------|------|---------------------------|-------------------|-------------------|------------------|-----------------|------------------------|-----------------------|
| <b>Dog</b> |      | <b>Brain</b>              | <b>Brain-PTV†</b> | <b>Brain stem</b> | <b>Right Eye</b> | <b>Left Eye</b> | <b>Right Inner Ear</b> | <b>Left Inner Ear</b> |
| <b>1</b>   | Min  | 0.51                      | 0.51              | 0.76              | 0.51             | 0.52            | 0.83                   | 1.29                  |
|            | Max  | 34.98                     | 30.83             | 25.25             | 0.52             | 0.61            | 14.03                  | 30.22                 |
|            | Mean | 8.61                      | 7.62              | 5.22              | 0.52             | 0.54            | 7.03                   | 16.87                 |
| <b>2</b>   | Min  | 0.25                      | N/A               | N/A               | 0.26             | 0.24            | 2.09                   | 0.52                  |
|            | Max  | 28.42                     |                   |                   | 0.31             | 0.29            | 29.76                  | 8.18                  |
|            | Mean | 7.98                      |                   |                   | 0.27             | 0.25            | 17.04                  | 2.60                  |
| <b>3</b>   | Min  | 0.77                      | N/A               | 0.00              | 5.07             | 0.54            | 0.00                   | 2.00                  |
|            | Max  | 34.71                     |                   | 1.84              | 25.73            | 4.65            | 24.05                  | 14.74                 |
|            | Mean | 10.70                     |                   | 0.82;             | 14.88            | 1.09            | 2.83                   | 6.89                  |
| <b>4</b>   | Min  | 0.37                      | N/A               | 0.35              | 0.38             | 0.36            | 0.53                   | 1.45                  |
|            | Max  | 39.39                     |                   | 5.96              | 0.53             | 0.40            | 9.50                   | 27.57                 |
|            | Mean | 5.96                      |                   | 0.59              | 0.40             | 0.37            | 1.89                   | 9.32                  |
| <b>5</b>   |      | 0.00                      | 0.00              | 1.05              | N/A              | N/A             | 1.17                   | 0.60                  |
|            | Min  | 44.96                     | 38.07             | 44.72             |                  |                 | 35.50                  | 4.48                  |

|          |      |       |      |       |      |      |       |       |
|----------|------|-------|------|-------|------|------|-------|-------|
|          | Max  | 10.01 | 8.89 | 16.44 |      |      | 13.75 | 1.13  |
|          | Mean |       |      |       |      |      |       |       |
| <b>6</b> | Min  | 0.30  | N/A  | 0.43  | 0.30 | 0.28 | 0.70  | 0.84  |
|          | Max  | 47.15 |      | 37.78 | 0.31 | 0.33 | 9.43  | 23.38 |
|          | Mean | 5.55  |      | 8.57  | 0.31 | 0.31 | 4.37  | 6.40  |
| <b>7</b> | Min  | 0.00  | N/A  | N/A   | 0.11 | 0.11 | 0.22  | 0.40  |
|          | Max  | 27.48 |      |       | 0.12 | 0.11 | 5.73  | 16.39 |
|          | Mean | 2.36  |      |       | 0.12 | 0.11 | 1.13  | 3.83  |
| <b>8</b> | Min  | 0.20  | N/A  | 0.25  | 0.20 | 0.19 | 0.55  | 0.85  |
|          | Max  | 30.77 |      | 30.13 | 0.21 | 0.20 | 11.43 | 27.07 |
|          | Mean | 4.36  |      | 5.86  | 0.21 | 0.20 | 4.76  | 9.10  |

\* OAR: Organs at risk.

† : Brain volume minus the planning target volume (PTV) that overlaps the normal brain. This structure was contoured and used at the discretion of the clinician.
