# Supplementary material
Source: PubMed Central journal article supplement (PMC5153959)
Supplement: JVIM-30-1112-s002.pdf [file JVIM-30-1112-s002.pdf]

**Supplemental Table 2: Radiation planning data: Dose to planning target volume (PTV).**

The minimum (Min), maximum (Max), and average volume (Mean) doses are listed.

|            | <b>Dose to PTV*</b>                                                                                        |                                      |
|------------|------------------------------------------------------------------------------------------------------------|--------------------------------------|
| <b>Dog</b> | <b>Dose at PTV isocenter(s) (Gy)</b>                                                                       | <b>Dose to PTV (Gy)</b>              |
| <b>1</b>   | Isocenter 1: 26.59<br>Isocenter 2: 28.15                                                                   | Min 20.81<br>Max 35.31<br>Mean 28.41 |
| <b>2</b>   | Isocenter 1: 26.88<br>Isocenter 2: 25.53                                                                   | Min 16.15<br>Max 30.58<br>Mean 25.92 |
| <b>3</b>   | Isocenter 1: 31.63<br>Isocenter 2: 22.31<br>Isocenter 3: 27.02<br>Isocenter 4: 30.91<br>Isocenter 5: 24.00 | Min 16.15<br>Max 30.58<br>Mean 25.92 |
| <b>4</b>   | Isocenter 1: 28.81<br>Isocenter 2: 29.02<br>Isocenter 3: 31.89                                             | Min 7.57<br>Max 40.32<br>Mean 27.04  |
| <b>5</b>   | Isocenter 1: 32.79<br>Isocenter 2: 30.87<br>Isocenter 3: 29.64<br>Isocenter 4: 28.96                       | Min 11.12<br>Max 44.95<br>Mean 30.73 |
| <b>6</b>   | Isocenter 1: 38.47<br>Isocenter 2: 30.24                                                                   | Min 16.39<br>Max 47.54               |

|   |                    |                                      |
|---|--------------------|--------------------------------------|
|   | Isocenter 3: 29.17 | Mean 30.62                           |
| 7 | Isocenter 1: 27.52 | Min 17.92<br>Max 27.50<br>Mean 26.05 |
| 8 | Isocenter 1 30.77  | Min 14.90<br>Max 30.77<br>Mean 28.02 |

\* PTV: Planning target volume
